# Supplementary material for: Kinetics of Cellular Cobalamin Uptake and Conversion: Comparison of Aquo/Hydroxocobalamin to Cyanocobalamin
Source: MDPI journal article supplement (doi:10.3390/nu16030378), 2024-01-27
Supplement: s1 [file s1]

# Kinetics of Cellular Cobalamin Uptake and Conversion: Comparison of Aquo/Hydroxocobalamin to Cyanocobalamin

Sergey N. Fedosov <sup>1,2,\*</sup>, Ebba Nexø <sup>2</sup> and Christian W. Heegaard <sup>1</sup>

<sup>1</sup> Department of Molecular Biology and Genetics, Aarhus University, 8000 Aarhus C, Denmark;

<sup>2</sup> Department of Clinical Medicine /Clinical Biochemistry, Aarhus University Hospital, 8200 Aarhus N, Denmark

\* Correspondence: snf@mbg.au.dk or snfedosov1960@gmail.com

## Section S1. Fusion of Several Intermediates into One “Pooled Metabolite” in Kinetic Models, Proof of the Concept

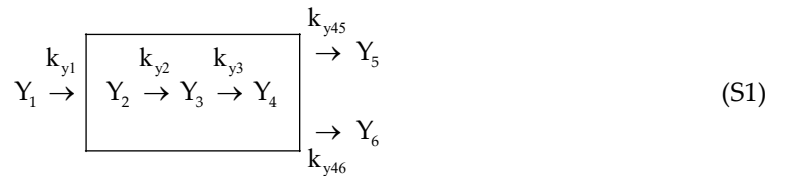

Fusion of several intermediates  $Y_i$  into a “pooled metabolite”  $\Sigma Y_i$  can be illustrated using Equation (S1) as a convenient example. The scheme can be regarded as a full description of a reaction block, related to the uptake of TC-Cbl and including:  $Y_1$  – extracellular TC-Cbl;  $Y_2$  – absorbed TC-Cbl inside an endosome;  $Y_3$  – TC-Cbl transferred to a lysosome;  $Y_4$  – the liberated original vitamin-form transported to the cytoplasm;  $Y_5$  – the original form of Cbl refluxed to the cell surface;  $Y_6$  – the reduced form of Cbl remaining in the cytoplasm. All intermediates are connected by irreversible mass action reactions with the given rate constants  $k_{yi}$ . The intermediates  $Y_2$ ,  $Y_3$ , and  $Y_4$  (shown within a frame) cannot be distinguished from each other in our setup. Therefore, we present them as a “pooled” metabolite  $\Sigma Y_i = Y_2 + Y_3 + Y_4$ , which gives a new simplified layout (Equation (S2)) of the original “accurate” Equation (S1).

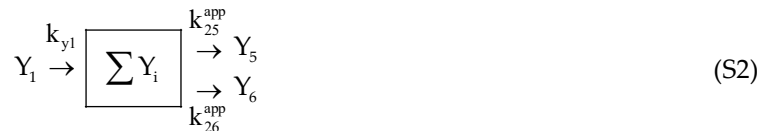

Such layout cancels  $Y_2$ ,  $Y_3$ , and  $Y_4$  and the related rate constants  $k_{y2}$ ,  $k_{y3}$ ,  $k_{y45}$  and  $k_{y46}$ , but introduces instead a new intermediate  $\Sigma Y_i$  and its new efflux coefficients:  $k_{25}^{app}$  and  $k_{26}^{app}$  (or just  $k_{25}^{app}$ , if only one efflux route exists). To connect the simplified Equation (S2) to the “true” Equation (S1), the canceled metabolite  $Y_4$  (at the end of the pooled reactions) should be expressed via its fraction  $f_{Y4}$  in the sum of  $Y_2 + Y_3 + Y_4$ . Afterward, the new efflux coefficients  $k_{25}^{app}$  and  $k_{26}^{app}$  should be expressed via  $f_{Y4}$  stipulated via the set of canceled constants. In such way, Equation (S2) will closely imitate the efflux from  $Y_4$  of Equation (S1). The approximate value of  $f_{Y4}$  can be assessed via a simple assumption. Thus, the metabolites of the central pool  $\rightarrow (Y_2 \rightarrow Y_3 \rightarrow Y_4) \rightarrow$  remain for a considerable time in a pseudo steady-state ( $dY_i/dt \approx 0$ ), being balanced by the influx ( $k_{y1}$ ) and the efflux ( $k_{y45}$  and  $k_{y46}$ ). Therefore, the below set of differential equations ((S3) – (S5), valid for Equation (S1)) can be used to express all constituents of the central pool ( $Y_2, Y_3, Y_4$ ) via the same intermediate (e.g.,  $Y_2$ ) and to calculate  $f_{Y4}$ .

$$\frac{d[Y_3]}{dt} = k_{y2} \times [Y_2] - k_{y3} \times [Y_3] \approx 0; \quad [Y_3] \approx \frac{k_{y2}}{k_{y3}} \times [Y_2] \quad (S3)$$

$$\frac{d[Y_4]}{dt} = k_{y3} \times [Y_3] - k_{\Sigma 4} \times [Y_4] \approx 0; \quad [Y_4] \approx \frac{k_{y2}}{k_{\Sigma 4}} \times [Y_2]; \quad k_{\Sigma 4} = (k_{y45} + k_{y46}) \quad (S4)$$

$$f_{Y4} = \frac{[Y_4]}{[Y_2] + [Y_3] + [Y_4]} \approx \frac{(k_{y2}/k_{\Sigma 4}) \times [Y_2]}{(1 + k_{y2}/k_{y3} + k_{y2}/k_{\Sigma 4}) \times [Y_2]} = \frac{1/k_{\Sigma 4}}{1/k_{y2} + 1/k_{y3} + 1/k_{\Sigma 4}} \quad (S5)$$

The approximate value of  $f_{Y4}$  is quite accurate in the middle of the reaction progress, but is expected to deviate from the true fraction of  $Y_4$  in the beginning and at the end of the process (i.e. when the intermediates of central pool are not in a steady state). Finally, the differential equation for  $Y_5$  accumulation in Equation (S1) was transformed to include  $\Sigma Y_i$  of Equation (S2) and to express  $k_{25}^{app}$  via  $k_{45}$  and  $f_{Y4}$ .

$$\frac{d[Y_5]}{dt} = k_{y45} \times [Y_4] \approx k_{y45} \times f_{Y4} \times [\Sigma Y_i] = k_{25}^{app} \times [\Sigma Y_i]; \quad k_{25}^{app} = \frac{k_{y45}/k_{\Sigma 4}}{1/k_{y2} + 1/k_{y3} + 1/k_{\Sigma 4}} \quad (S6)$$

The analogous procedure for  $Y_6$  gives the expression for  $k_{26}^{app}$ , where  $k_{46}$  substitutes for  $k_{45}$ , while the rest of equation remains identical to  $k_{25}^{app}$ . Proportion between  $Y_5$  and  $Y_6$  in Equation (S2) is determined by the ratio of  $k_{y45} / k_{y46}$ , as in Equation (S1). If branching to  $Y_6$  is absent and the reactions follow a linear chain from  $Y_1$  to  $Y_5$ , then the efflux equation (as well as its rate coefficient  $k_2^{app}$ ) gets simplified, as shown in Equation S7.

$$\frac{d[Y_5]}{dt} = k_{y4} \times [Y_4] \approx k_{y4} \times f_{Y4} \times [\Sigma Y_i] = k_2^{app} \times [\Sigma Y_i]; \quad k_2^{app} = \frac{1}{1/k_{y2} + 1/k_{y3} + 1/k_4} \quad (S7)$$

The aforementioned procedures connect the simplified Equation (S2) to the “true” Equation (S1), and one can expect a high degree of resemblance between the two models. Yet, some deviation is still expected, and the degree of this deviation would increase at a high representation of the pooled metabolites  $Y_2$ ,  $Y_3$  and  $Y_4$  (i.e. the intermediates, whose concentrations cannot be mimicked with the absolute precision within Equation (S2)). Therefore, the behavior of a “faulty” Equation (S2) was modeled in respect to the “true” Equation (S1) on two examples. They represented (i) a difficult case, described by an “inconvenient” combination of constants (which give very high quantities of transient intermediates); and (ii) a more favorable case (where a reasonably “convenient” combination of constants gives moderate quantities of the transient intermediates). Reasonably adequate approximations were observed in both cases, see Figure S1a and Figure S1b. In the first case, a high quantity of  $Y_1 + Y_2 + Y_3$  was accumulated, and the approximating tracks of  $\Sigma Y_i$  and  $Y_5$  (dashed lines) showed a somewhat higher deviation from the respective records of the “true” scheme (solid lines). In the second case (with a lower sum of  $Y_1 + Y_2 + Y_3$ ) the deviation of the simplified scheme was less pronounced. We considered the presented material as a sufficient validation of our approach, where several metabolic steps and several intermediates are pooled together into a joined block.

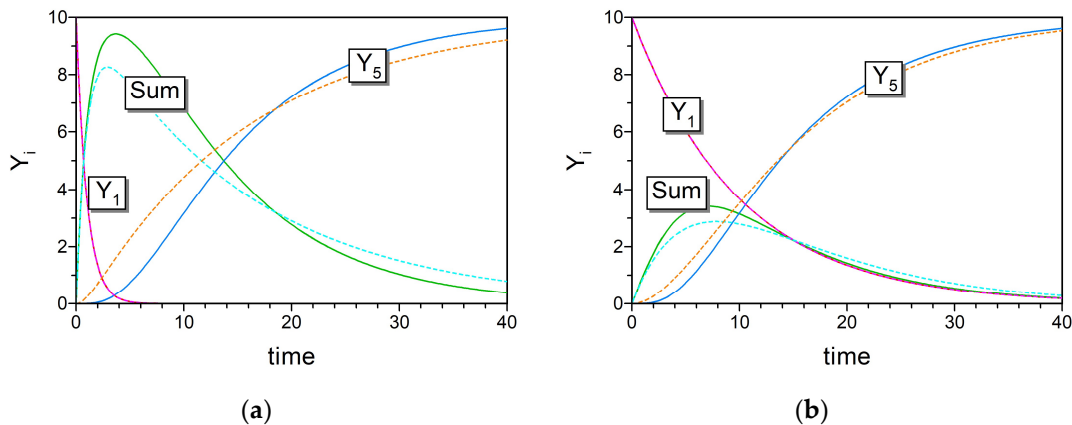

**Figure S1.** Modeling of sequential conversions according to the “true” scheme  $Y_1 \rightarrow Y_2 \rightarrow Y_3 \rightarrow Y_4 \rightarrow Y_5$  (solid lines) vs. its approximating imitation with pooled metabolites  $Y_1 \rightarrow \Sigma Y_i \rightarrow Y_5$  (dashed lines).

The efflux constant of the simplified model ( $k_2^{app}$ ) was calculated from the constants of the “true” scheme according to Equation (S7). All concentrations and rate constants are given in arbitrary units. The simulations were started from  $Y_1 = 10$ . The records for  $Y_2+Y_3+Y_4$  or  $\Sigma Y_i$  are notated as “Sum”. (a) Modeling of a difficult case with an “inconvenient” combination of the true rate constants ( $k_{y1} = 1$ ,  $k_{y2} = 0.3$ ,  $k_{y3} = 0.5$ ,  $k_{y4} = 0.1$ ), corresponding to  $k_{y1} = 1$  and  $k_2^{app} = 0.0652$  in the simplified model. (b) Modeling of a favorable case with a “convenient” combination of the rate constants ( $k_{y1} = 0.1$ ,  $k_{y2} = 0.3$ ,  $k_{y3} = 0.5$ ,  $k_{y4} = 1$ ), corresponding to  $k_{y1} = 1$  and  $k_2^{app} = 0.158$  in the simplified model.

## Section S2. Differential Equations used during Kinetic Modeling

The set of differential equation, which describe the kinetic scheme in Figure 5, is shown below.

$$\frac{d[R_{out}]}{dt} = v_1 - k_2 \times [R_{out}] - k_3 \times [R_{out}] \times [C_{out}] \quad (S8)$$

$$\frac{d[C_{out}]}{dt} = -k_3 \times [R_{out}] \times [C_{out}] + k_5 \times [C_{surf}] \quad (S9)$$

$$\frac{d[C_{in}]}{dt} = k_3 \times [R_{out}] \times [C_{out}] - (k_4 + k_6) \times [C_{in}] \quad (S10)$$

$$\frac{d[C_{surf}]}{dt} = k_4 \times [C_{in}] - k_5 \times [C_{surf}] \quad (S11)$$

$$\frac{d[C_2]}{dt} = k_6 \times [C_{in}] - (k_{+7} + k_{+8}) \times [C_2] + k_{-7} \times [MC] + k_{-8} \times [AC] \quad (S12)$$

$$\frac{d[MC]}{dt} = k_{+7} \times [C_2] - k_{-7} \times [MC] \quad (S13)$$

$$\frac{d[AC]}{dt} = k_{+8} \times [C_2] - k_{-8} \times [AC] \quad (S14)$$

## Section S3. Validation of the Model by Analysis of Residuals

The accuracy of the model was examined by analysis of residuals. The verification process followed the steps listed below.

(C1) The average experimental error (standard deviation,  $\sigma$ ) of the data was assessed in Figures 2a, 2b, 4a and 4b. For this purpose, the standard deviations ( $\sigma_i$ ) were calculated for each set of points containing repeated measurements (time 24 h and 48 h in settings with CNCbl and HOCbl added). Tukey-Kramer tests (multiple pairwise comparisons) showed a high probability ( $p = 0.13 - 0.99$ ) of an identical  $\sigma$ -value in these individual datasets in each particular panel. Therefore, the individual variances ( $\sigma_i^2$ ) were averaged for each panel as follows:

$$\sigma^2 = \frac{\sum (n_i - 1) \times \sigma_i^2}{\sum (n_i - 1)}$$

where  $n_i$  is the number of points in the individual datasets (numbered as “i”). The calculated average  $\sigma$ -values are given in legends to Figures 2a, 2b, 4a and 4b.

(C2) Relative residuals (rr) were calculated for Figures 2a, 2b, 4a and 4b as  $rr = (y_i - f(x))/\sigma$ , where  $y_i$  notates the experimental measurement,  $f(x)$  is the simulated theoretical value, and  $\sigma$  represents the respective experimental dispersion of the points in each particular panel, see the above paragraph (C1). Normality of the pooled rr-distributions in each panel was confirmed by Shapiro-Wilk test ( $p = 0.35 - 0.71$ ).

(C3) Relative residuals (rr) in Figures 2a, 2b, 4a and 4b were examined as functions of time ( $rr = P_1 \cdot t$ ) with the purpose of revealing a systematic deviation, expressed as the slope  $P_1$  significantly different from zero. If such deviation was present, suitable parameters of the model were corrected. The final model gave the rr-chart shown in Figure S2 with the overall slope of  $P_1 = -0.0010 \pm 0.0037$ . Its identity to zero was highly probable ( $p = 0.79$ ), as was confirmed by t-test. The model was assumed as a valid approximation of the experimental data.

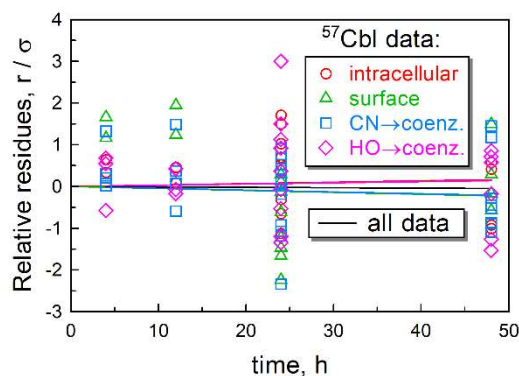

**Figure S2.** Dependences of relative residues ( $rr = r/\sigma$ ) on time ( $rr = P_1 \cdot t$ ). The calculated slopes were  $P_1 = 0.00338 \pm 0.00744$  (Figure 2a, accumulation of the intracellular  $^{57}\text{Cbl}$ , red circles);  $P_1 = -0.00465 \pm 0.01058$  (Figure 2b, turnovers of the surface  $^{57}\text{Cbl}$ , green triangles);  $P_1 = -0.00435 \pm 0.00555$  (Figure 4a, conversion of  $\text{CN}^{57}\text{Cbl}$  to the Cbl-coenzymes, blue squares); and  $P_1 = 0.00290 \pm 0.00780$  (Figure 4b, conversion of  $\text{HO}^{57}\text{Cbl}$  to the Cbl-coenzymes, magenta diamonds). The respective probabilities of a zero slope (i.e. absence of a systematic error in the model) were  $p = 0.656, 0.666, 0.440$  and  $0.714$ . The global fit of all relative residues (black line) gave  $P_1 = -0.0010 \pm 0.00372$  (equal to zero with  $p = 0.79$ ).

#### Section S4. Preservation of Cbls during Phenol-Chloroform Extraction

A mixture of several Cbls was added to either (i) test sample containing blood plasma + 10 mM glutathione (GSH), all diluted 1 : 5 with 0.32 M  $\text{NH}_4\text{Acetate}$  buffer, pH 4.6; or (ii) control sample containing 0.2 M  $\text{NH}_4\text{Acetate}$  buffer, pH 9.3. The Cbl-mixture included GSCbl, HOCbl, CNCbl, MeCbl, AdoCbl, the final concentration of each Cbl = 10  $\mu\text{M}$ . The control sample was just heated before HPLC analysis (see Section 2.3), while the test mixture was extracted according to the full method described in Section 2.3. At the end of this procedure, the concentration of Cbls in the test sample (dissolved in 0.2 M  $\text{NH}_4\text{Acetate}$  buffer, pH 9.3) was adjusted to match Cbls in the control sample. Both preparations were subjected to HPLC analysis, and the profiles are compared in Figure S3. Both samples showed a successful conversion of GSCbl and HOCbl to  $\text{NH}_3\text{Cbl}$ . No change in the proportion of Cbls was found in the test sample compared to the control sample (compare green and blue profiles in Figure S3).

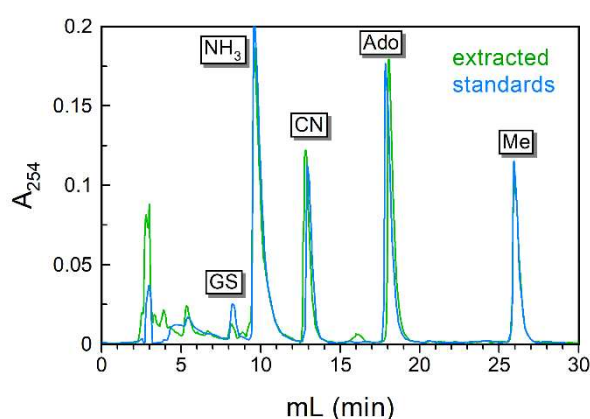

**Figure S3.** HPLC profile of the extracted Cbl-mixture (green record) compared to the control mixture (blue record). Notations GS,  $\text{NH}_3$ , CN, Ado, Me reflect the coordinated X-groups in each particular XCbl, eluted at the indicated retention time.
